# Supplementary material
Source: publisher figshare collection journal article supplement (https://frontiersin.figshare.com/ndownloader/files/33157484)
Supplement: Supplementary file [file 33157484]

Supplementary table 1

|                                                         |                  |                  |                  |                  |
|---------------------------------------------------------|------------------|------------------|------------------|------------------|
| Figure 1A (CD3)                                         |                  |                  |                  |                  |
|                                                         | non-pregnant     | pregnant         |                  |                  |
|                                                         |                  | 1st trimester    | 2nd trimester    | 3rd trimester    |
| $\gamma\delta$ TCR+/CD56+                               | 2.34 $\pm$ 0.35  | 1.76 $\pm$ 0.25  | 2.12 $\pm$ 0.42  | 1.95 $\pm$ 0.23  |
| Figure 1B ( $\gamma\delta$ TCR+)                        |                  |                  |                  |                  |
|                                                         | non-pregnant     | pregnant         |                  |                  |
|                                                         |                  | 1st trimester    | 2nd trimester    | 3rd trimester    |
| CD3+/CD56+                                              | 48.22 $\pm$ 3.42 | 46.91 $\pm$ 3.98 | 49.31 $\pm$ 3.41 | 51.12 $\pm$ 3.38 |
| Figure 1C (CD56+)                                       |                  |                  |                  |                  |
|                                                         | non-pregnant     | pregnant         |                  |                  |
|                                                         |                  | 1st trimester    | 2nd trimester    | 3rd trimester    |
| $\gamma\delta$ T cells (CD3+/ $\gamma\delta$ TCR+)      | 5.19 $\pm$ 1.11  | 4.87 $\pm$ 0.47  | 9.22 $\pm$ 0.77  | 8.39 $\pm$ 0.81  |
| non- $\gamma\delta$ T cells (CD3+/ $\gamma\delta$ TCR-) | 3.88 $\pm$ 0.6   | 3.39 $\pm$ 0.53  | 2.14 $\pm$ 0.4   | 2.26 $\pm$ 0.39  |

|                                 |                  |                  |                  |                  |
|---------------------------------|------------------|------------------|------------------|------------------|
| Figure 2A (CD4-/CD8-)           |                  |                  |                  |                  |
|                                 | non-pregnant     | pregnant         |                  |                  |
|                                 |                  | 1st trimester    | 2nd trimester    | 3rd trimester    |
| CD3+/ $\gamma\delta$ TCR+/CD56+ | 49.27 $\pm$ 4.81 | 44.63 $\pm$ 3.78 | 48.48 $\pm$ 4.21 | 49.23 $\pm$ 4.46 |
| CD3+/ $\gamma\delta$ TCR+/CD56- | 32.52 $\pm$ 3.07 | 37.01 $\pm$ 2.86 | 35.56 $\pm$ 3.45 | 32.52 $\pm$ 2.34 |
| Figure 2B (CD4+/CD8-)           |                  |                  |                  |                  |
|                                 | non-pregnant     | pregnant         |                  |                  |
|                                 |                  | 1st trimester    | 2nd trimester    | 3rd trimester    |
| CD3+/ $\gamma\delta$ TCR+/CD56+ | 8.87 $\pm$ 3.05  | 12.68 $\pm$ 1.49 | 7.88 $\pm$ 0.98  | 11.79 $\pm$ 1.75 |
| CD3+/ $\gamma\delta$ TCR+/CD56- | 30.35 $\pm$ 2.28 | 28.01 $\pm$ 1.83 | 28.73 $\pm$ 2.66 | 32.69 $\pm$ 2.26 |
| Figure 2C (CD4-/CD8+)           |                  |                  |                  |                  |
|                                 | non-pregnant     | pregnant         |                  |                  |
|                                 |                  | 1st trimester    | 2nd trimester    | 3rd trimester    |
| CD3+/ $\gamma\delta$ TCR+/CD56+ | 31.85 $\pm$ 3.03 | 24.88 $\pm$ 2.02 | 28.86 $\pm$ 2.88 | 25.15 $\pm$ 3.42 |
| CD3+/ $\gamma\delta$ TCR+/CD56- | 24.74 $\pm$ 1.47 | 21.23 $\pm$ 1.13 | 24.08 $\pm$ 1.45 | 24.25 $\pm$ 1.45 |

|                                         |                  |                  |                  |                  |
|-----------------------------------------|------------------|------------------|------------------|------------------|
| Figure 3A (CD107a+)                     |                  |                  |                  |                  |
|                                         | non-pregnant     | pregnant         |                  |                  |
|                                         |                  | 1st trimester    | 2nd trimester    | 3rd trimester    |
| CD3+/ $\gamma\delta$ TCR+/CD56+         | 46.43 $\pm$ 2.82 | 42.49 $\pm$ 2.91 | 45.86 $\pm$ 5.11 | 44.8 $\pm$ 4.23  |
| CD3+/ $\gamma\delta$ TCR+/CD56-         | 17.23 $\pm$ 0.73 | 21.46 $\pm$ 2.13 | 21.79 $\pm$ 2.1  | 21.26 $\pm$ 1.53 |
| Figure 3B (CD107a-MFI)                  |                  |                  |                  |                  |
|                                         | non-pregnant     | pregnant         |                  |                  |
|                                         |                  | 1st trimester    | 2nd trimester    | 3rd trimester    |
| CD3+/ $\gamma\delta$ TCR+/CD56+/CD107a+ | 11096 $\pm$ 1027 | 6444 $\pm$ 411   | 7095 $\pm$ 497   | 8181 $\pm$ 531   |
| CD3+/ $\gamma\delta$ TCR+/CD56-/CD107a+ | 5863 $\pm$ 219   | 4593 $\pm$ 193   | 4941 $\pm$ 354   | 4876 $\pm$ 228   |

Supplementary table 1

|                                          |                  |                  |                  |                  |
|------------------------------------------|------------------|------------------|------------------|------------------|
| Figure 4A (PD-1+)                        |                  |                  |                  |                  |
|                                          | non-pregnant     | pregnant         |                  |                  |
|                                          |                  | 1st trimester    | 2nd trimester    | 3rd trimester    |
| CD3+/ $\gamma$ $\delta$ TCR+/CD56+       | 15.69 $\pm$ 1.35 | 21.89 $\pm$ 1.55 | 17.59 $\pm$ 0.75 | 16.17 $\pm$ 1.06 |
| CD3+/ $\gamma$ $\delta$ TCR+/CD56-       | 10.55 $\pm$ 0.85 | 15.08 $\pm$ 0.69 | 13.75 $\pm$ 0.83 | 12.59 $\pm$ 1.07 |
| Figure 4B (PD-1-MFI)                     |                  |                  |                  |                  |
|                                          | non-pregnant     | pregnant         |                  |                  |
|                                          |                  | 1st trimester    | 2nd trimester    | 3rd trimester    |
| CD3+/ $\gamma$ $\delta$ TCR+/CD56+/PD-1+ | 2140 $\pm$ 173   | 2409 $\pm$ 149   | 2388 $\pm$ 113   | 2562 $\pm$ 198   |
| CD3+/ $\gamma$ $\delta$ TCR+/CD56-/PD-1+ | 2257 $\pm$ 167   | 2456 $\pm$ 172   | 2324 $\pm$ 113   | 2435 $\pm$ 177   |

|                                            |                  |                  |                  |                  |
|--------------------------------------------|------------------|------------------|------------------|------------------|
| Figure 5B1 (PD-1+/CD107a-)                 |                  |                  |                  |                  |
|                                            | non-pregnant     | pregnant         |                  |                  |
|                                            |                  | 1st trimester    | 2nd trimester    | 3rd trimester    |
| CD3+/ $\gamma$ $\delta$ TCR+/CD56+         | 5.52 $\pm$ 0.91  | 10.83 $\pm$ 1.21 | 9.09 $\pm$ 1.08  | 6.88 $\pm$ 0.94  |
| CD3+/ $\gamma$ $\delta$ TCR+/CD56-         | 6.47 $\pm$ 0.61  | 10.39 $\pm$ 0.51 | 9.42 $\pm$ 0.84  | 7.69 $\pm$ 0.71  |
| Figure 5B2 (PD-1-/CD107a+)                 |                  |                  |                  |                  |
|                                            | non-pregnant     | pregnant         |                  |                  |
|                                            |                  | 1st trimester    | 2nd trimester    | 3rd trimester    |
| CD3+/ $\gamma$ $\delta$ TCR+/CD56+         | 34.04 $\pm$ 1.44 | 31.75 $\pm$ 2.52 | 35.84 $\pm$ 4.05 | 35.35 $\pm$ 3.22 |
| CD3+/ $\gamma$ $\delta$ TCR+/CD56-         | 14.27 $\pm$ 0.71 | 17.48 $\pm$ 1.19 | 16.6 $\pm$ 1.21  | 17.71 $\pm$ 1.06 |
| Figure 5B3 (PD-1+/CD107a+)                 |                  |                  |                  |                  |
|                                            | non-pregnant     | pregnant         |                  |                  |
|                                            |                  | 1st trimester    | 2nd trimester    | 3rd trimester    |
| CD3+/ $\gamma$ $\delta$ TCR+/CD56+         | 12.86 $\pm$ 1.73 | 11.25 $\pm$ 1.19 | 9.02 $\pm$ 1.17  | 9.64 $\pm$ 1.4   |
| CD3+/ $\gamma$ $\delta$ TCR+/CD56-         | 3.02 $\pm$ 0.2   | 4.23 $\pm$ 0.55  | 4.55 $\pm$ 0.51  | 4.26 $\pm$ 0.38  |
| Figure 5C (PD-1+)                          |                  |                  |                  |                  |
|                                            | non-pregnant     | pregnant         |                  |                  |
|                                            |                  | 1st trimester    | 2nd trimester    | 3rd trimester    |
| CD3+/ $\gamma$ $\delta$ TCR+/CD56+/CD107a+ | 26.83 $\pm$ 1.99 | 19.47 $\pm$ 1.94 | 20.75 $\pm$ 1.65 | 21.28 $\pm$ 1.74 |
| CD3+/ $\gamma$ $\delta$ TCR+/CD56-/CD107a+ | 17.29 $\pm$ 1.26 | 25.67 $\pm$ 1.65 | 20.22 $\pm$ 1.17 | 19.75 $\pm$ 1.35 |

|                                                  |                |                |                |                |
|--------------------------------------------------|----------------|----------------|----------------|----------------|
| Figure 6A (CD107a-MFI)                           |                |                |                |                |
|                                                  | non-pregnant   | pregnant       |                |                |
|                                                  |                | 1st trimester  | 2nd trimester  | 3rd trimester  |
| CD3+/ $\gamma$ $\delta$ TCR+/CD56+/CD107a+/PD-1+ | 9174 $\pm$ 875 | 8036 $\pm$ 798 | 9229 $\pm$ 811 | 9422 $\pm$ 688 |
| CD3+/ $\gamma$ $\delta$ TCR+/CD56+/CD107a+/PD-1- | 7141 $\pm$ 374 | 6298 $\pm$ 329 | 7530 $\pm$ 583 | 6913 $\pm$ 531 |
| Figure 6B (CD107a-MFI)                           |                |                |                |                |
|                                                  | non-pregnant   | pregnant       |                |                |
|                                                  |                | 1st trimester  | 2nd trimester  | 3rd trimester  |
| CD3+/ $\gamma$ $\delta$ TCR+/CD56-/CD107a+/PD-1+ | 5558 $\pm$ 211 | 4424 $\pm$ 193 | 5018 $\pm$ 355 | 4452 $\pm$ 203 |
| CD3+/ $\gamma$ $\delta$ TCR+/CD56-/CD107a+/PD-1- | 6777 $\pm$ 327 | 5018 $\pm$ 254 | 6840 $\pm$ 665 | 6608 $\pm$ 600 |
